# Supplementary material for: Hollow Sr/Rh-codoped TiO2 photocatalyst for efficient sunlight-driven organic compound degradation
Source: Royal Society of Chemistry journal article supplement (doi:10.1039/c6ra25987a), 2017-01-01
Supplement: c6ra25987a1.pdf [file c6ra25987a1.pdf]

## Hollow Sr/Rh-codoped TiO<sub>2</sub> Photocatalyst for Efficient Sunlight-driven Organic Compound Degradation

Chinh-Chien Nguyen<sup>a</sup>, Cao-Thang Dinh<sup>b</sup>, Trong-On Do<sup>a\*</sup>

- a) Department of Chemical Engineering, Laval University, Quebec, G1V 0A8, Canada; Email: [trong-on.do@gch.ulaval.ca](mailto:trong-on.do@gch.ulaval.ca); Fax +1-418-656-5993; Tel.: +1-418-656-3774
- b) Department of Electrical and Computer Engineering, University of Toronto, Toronto, ON, M5S 1A4, Canada

### SUPPORTING INFORMATION

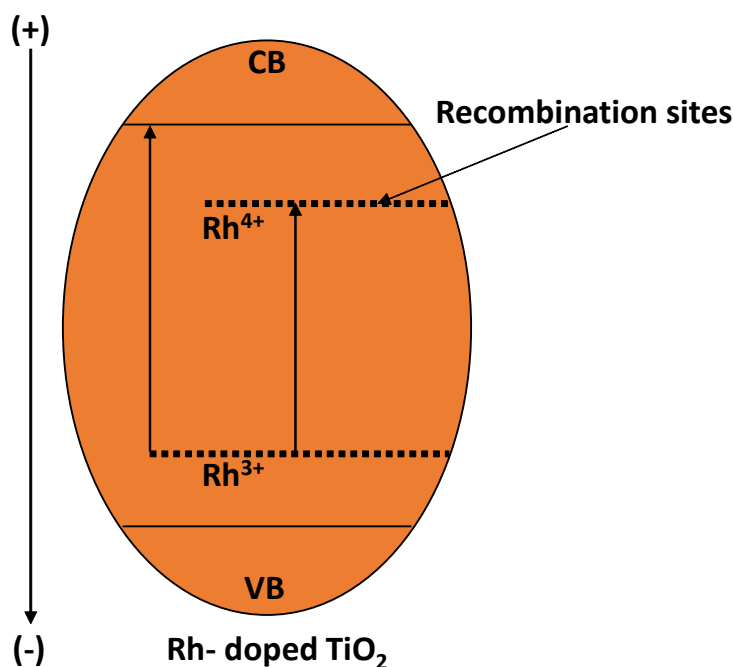

**Figure SI 1.** Illustration of the two states of Rh<sup>3+</sup> and Rh<sup>4+</sup>-doped TiO<sub>2</sub>. Rh<sup>3+</sup> contributes a donor level to the valence band, narrowing the band gap and shifting light absorption to the visible region, whereas Rh<sup>4+</sup> introduces an electron acceptor level below the conduction band, which serves as a recombination site, reducing the activity of the materials. <sup>1, 2</sup>

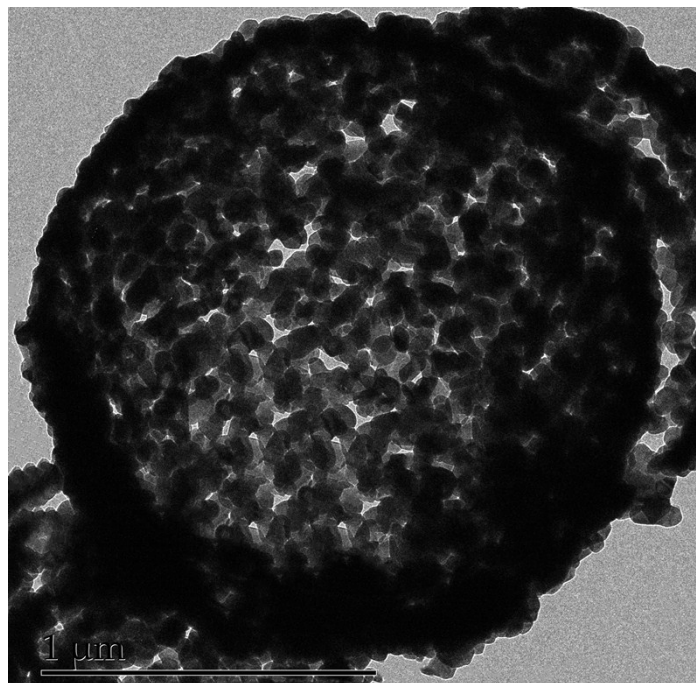

**Figure SI 2.** TEM image of hollow Rh/Sr-TiO<sub>2</sub>-900.

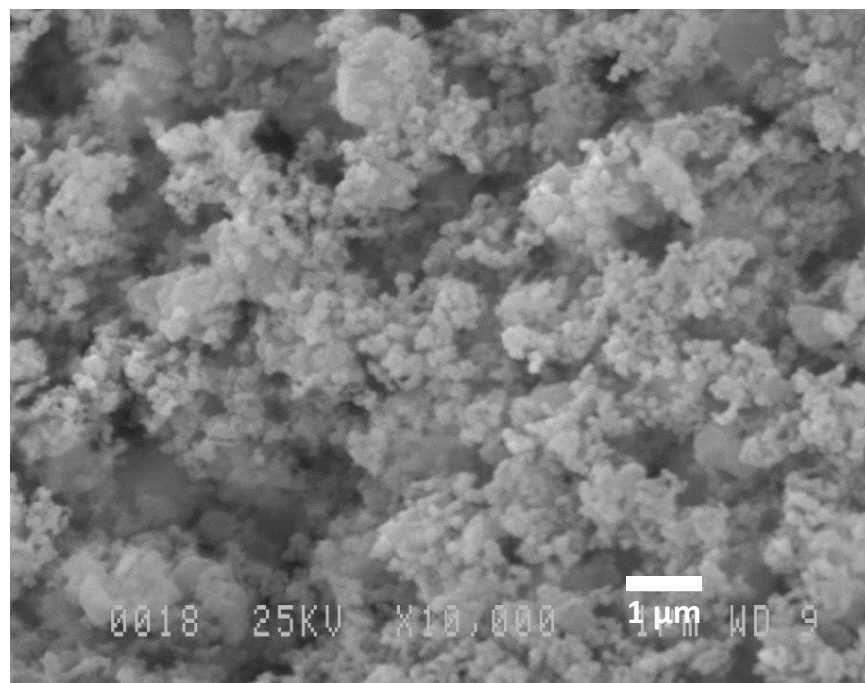

**Figure SI 3.** SEM image of Rh-TiO<sub>2</sub>-900.

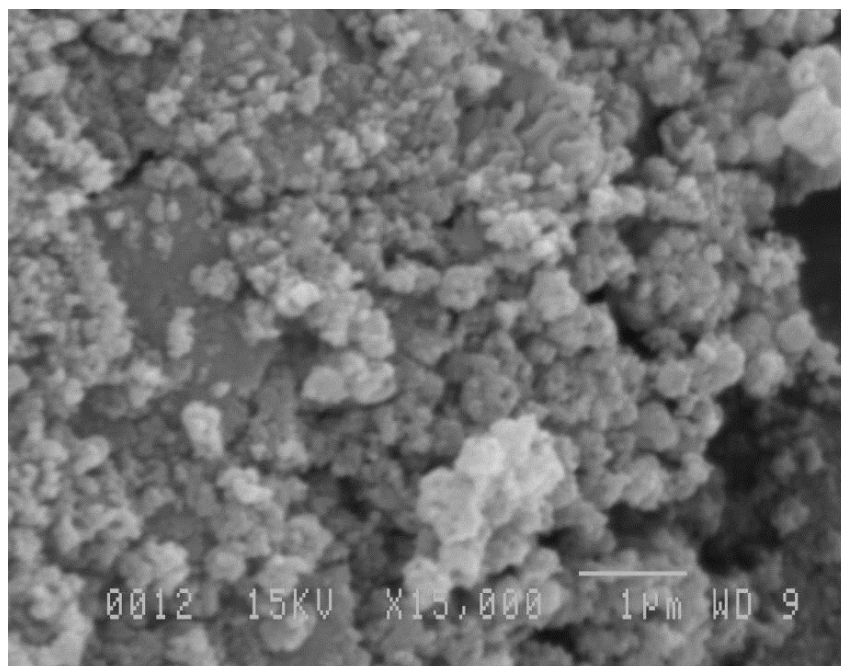

**Figure SI 4.** SEM image of  $\text{TiO}_2$ -900.

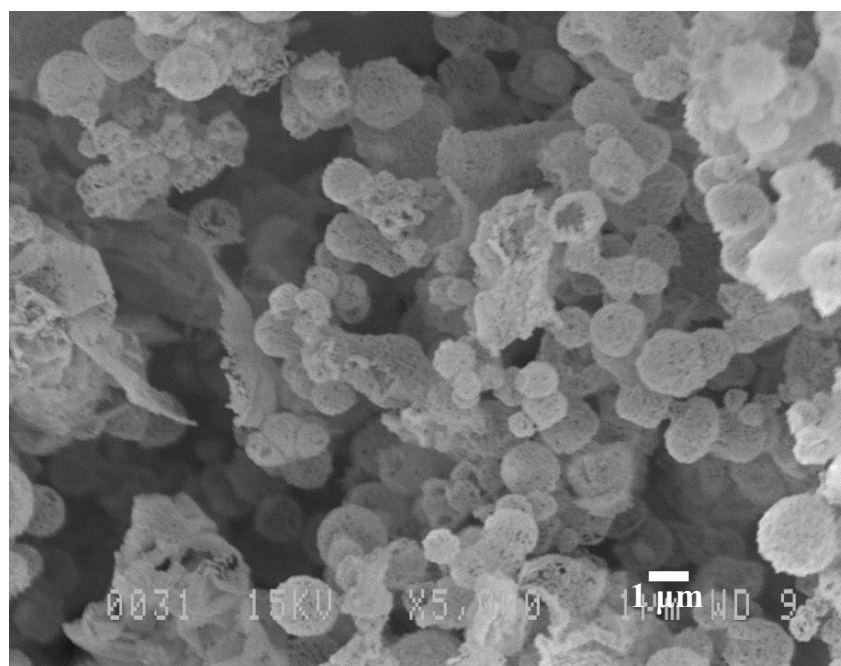

**Figure SI 5.** SEM image of hollow  $\text{Sr-TiO}_2$ -900.

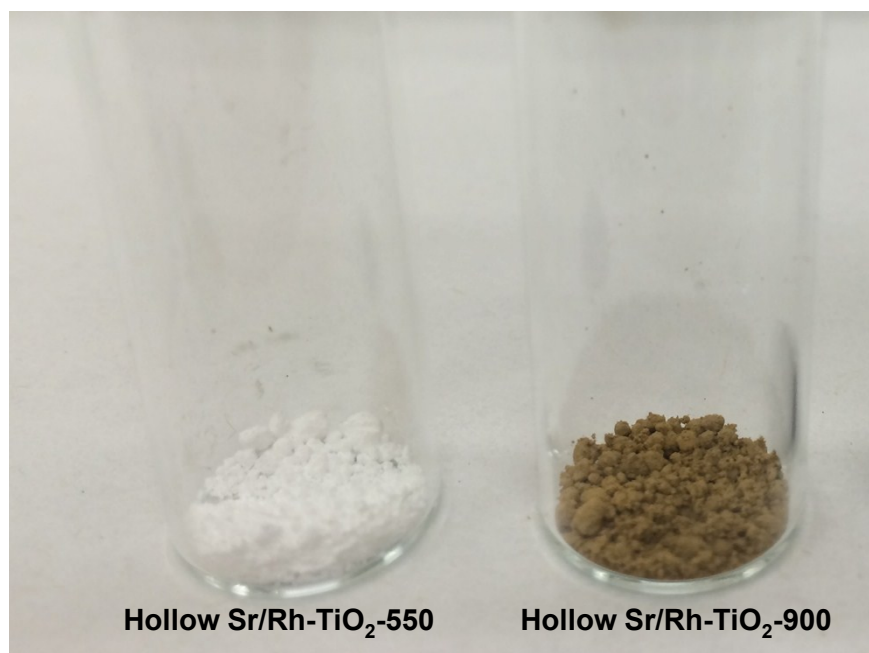

**Figure SI 6.** Photograph of hollow Sr/Rh-TiO<sub>2</sub>-550 and hollow Sr/Rh-TiO<sub>2</sub>-900 indicates the critical change in colour from white to yellow after calcination at 900 °C

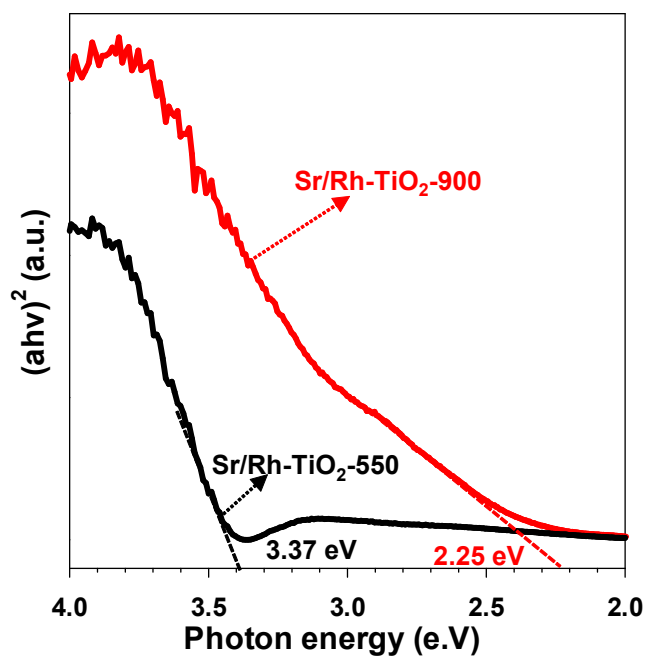

**Figure SI 7.** Plot of ( $\alpha h\nu$ )<sup>2</sup> versus photon energy for the band gap energies of hollow Rh,Sr-TiO<sub>2</sub> after calcination at (a) 550 °C and (b) 900 °C.

**Table SI 1.** Binding energy of Ti2p and O1s peaks.

| <b>Sample</b>                      | <b>TiO<sub>2</sub> Phase</b> | <b>Ti 2p<sub>3/2</sub> position (eV)</b> | <b>O 1S position (eV)</b> |
|------------------------------------|------------------------------|------------------------------------------|---------------------------|
| A-TiO <sub>2</sub>                 | Anatase                      | 458.4                                    | 529.8                     |
| Hollow Sr/Rh-TiO <sub>2</sub> -550 | Anatase                      | 458.4                                    | 529.8                     |
| R-TiO <sub>2</sub>                 | Rutile                       | 458.3                                    | <b>529.6</b>              |
| Hollow Sr-TiO <sub>2</sub> -900    | Rutile                       | 458.3                                    | <b>529.6</b>              |
| Rh-TiO <sub>2</sub> -900           | Rutile                       | 458.2                                    | <b>529.3</b>              |
| Hollow Sr/Rh-TiO <sub>2</sub> -900 | Rutile                       | 457.8                                    | <b>529.9</b>              |

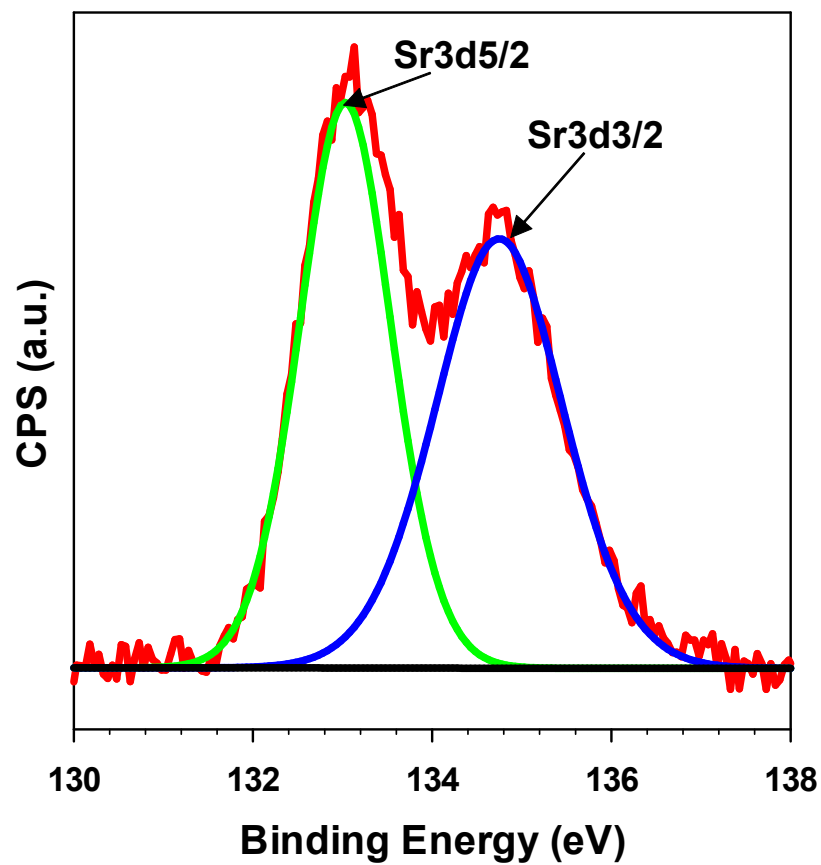

Figure SI 8. Sr<sub>3d</sub> deconvolution peak of hollow Sr/Rh-TiO<sub>2</sub>-900.

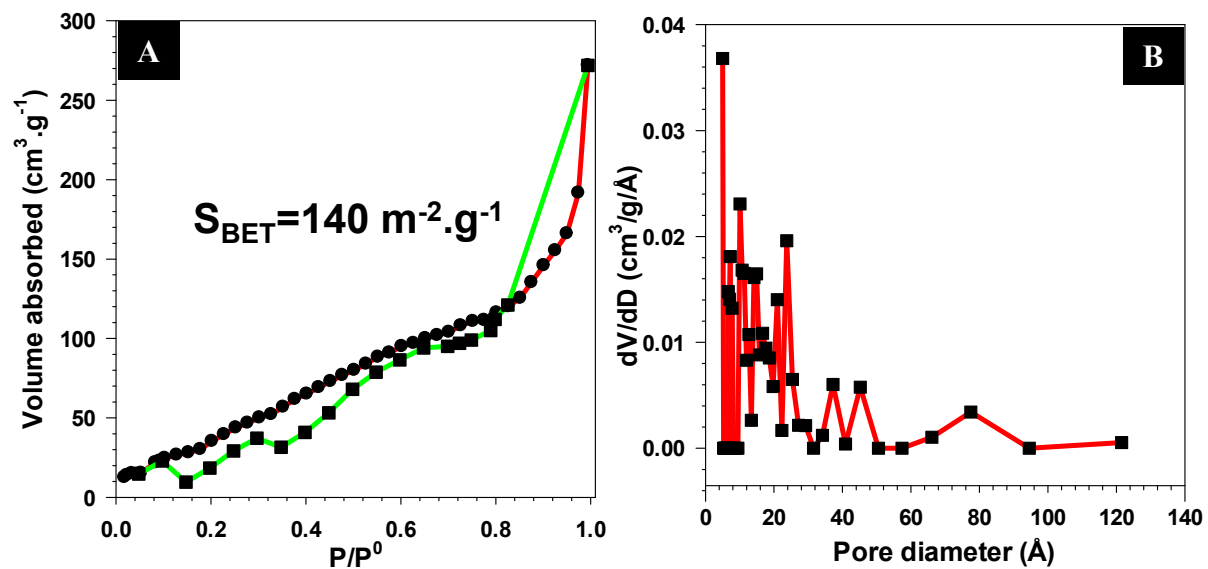

**Figure SI 9.** (A) Nitrogen adsorption/desorption isotherms of hollow Sr/Rh-TiO<sub>2</sub>-900 . (B) The corresponding BJH pore size distributions.

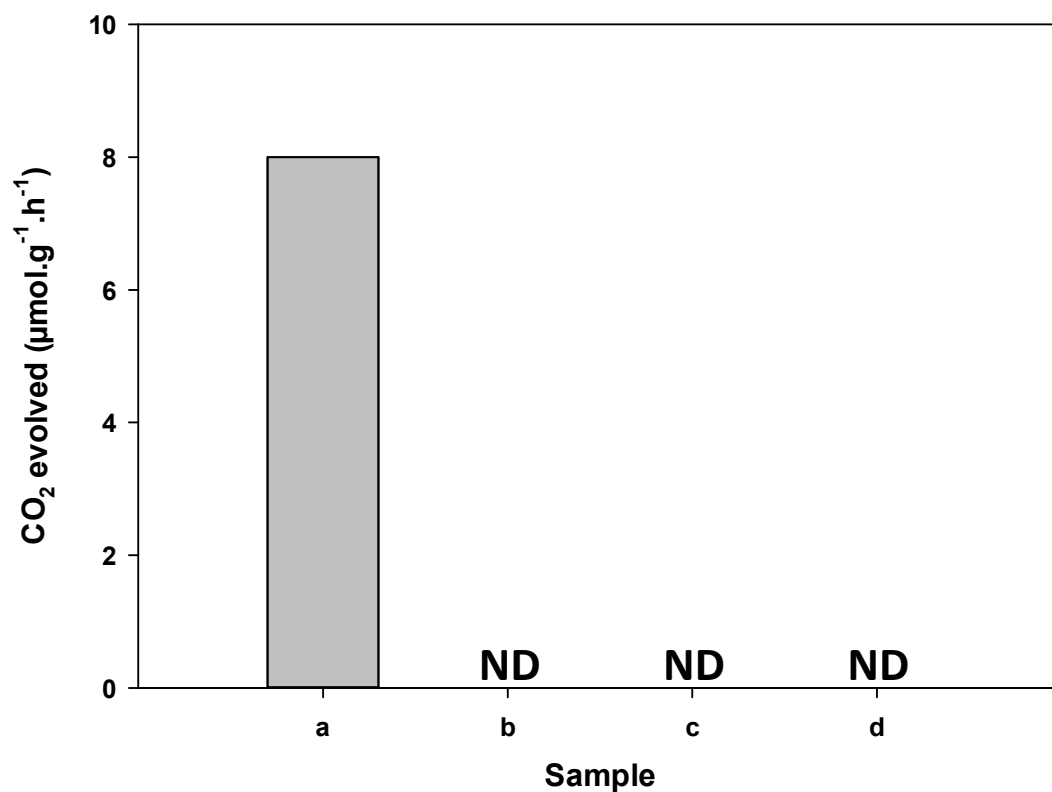

**Figure SI 10.** CO<sub>2</sub> formation from the photodegradation of isopropanol of different types of free- Pt photocatalysts under solar simulator irradiation (AM 1.5 G, intensity 100 mW cm<sup>-2</sup>): a) hollow Sr/Rh-TiO<sub>2</sub>-900; b) bulk Sr/Rh-TiO<sub>2</sub>-B; c) rutile TiO<sub>2</sub>; d) Rh-TiO<sub>2</sub>-900. ND: not detected.



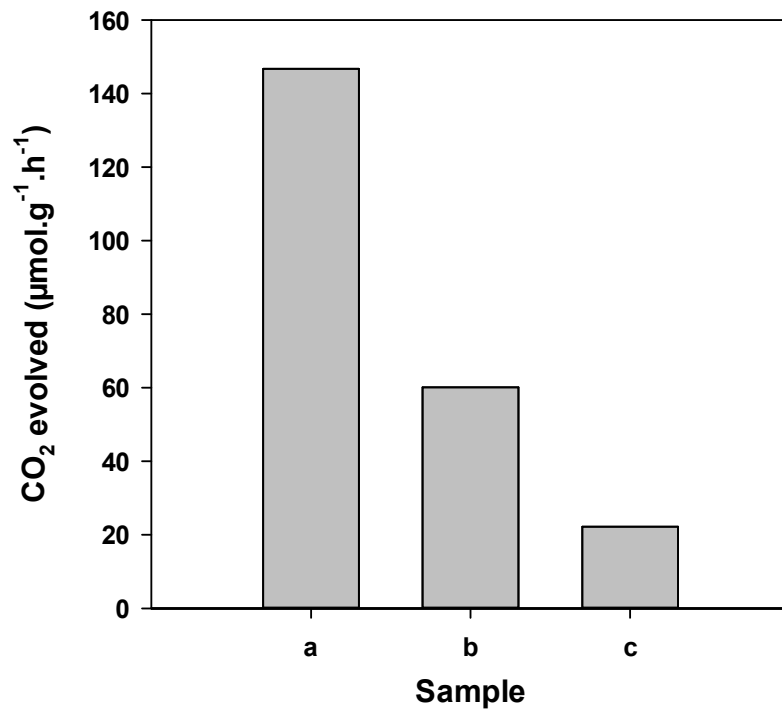

**Figure SI 11.** CO<sub>2</sub> formation from the photo-degradation of isopropanol of 1.0% Pt-supported samples under solar simulator irradiation (AM 1.5 G, intensity 100 mW cm<sup>-2</sup>): a) hollow Sr/Rh-TiO<sub>2</sub>-900; b) hollow Sr/Rh-TiO<sub>2</sub>-550; c) TiO<sub>2</sub>- P25.

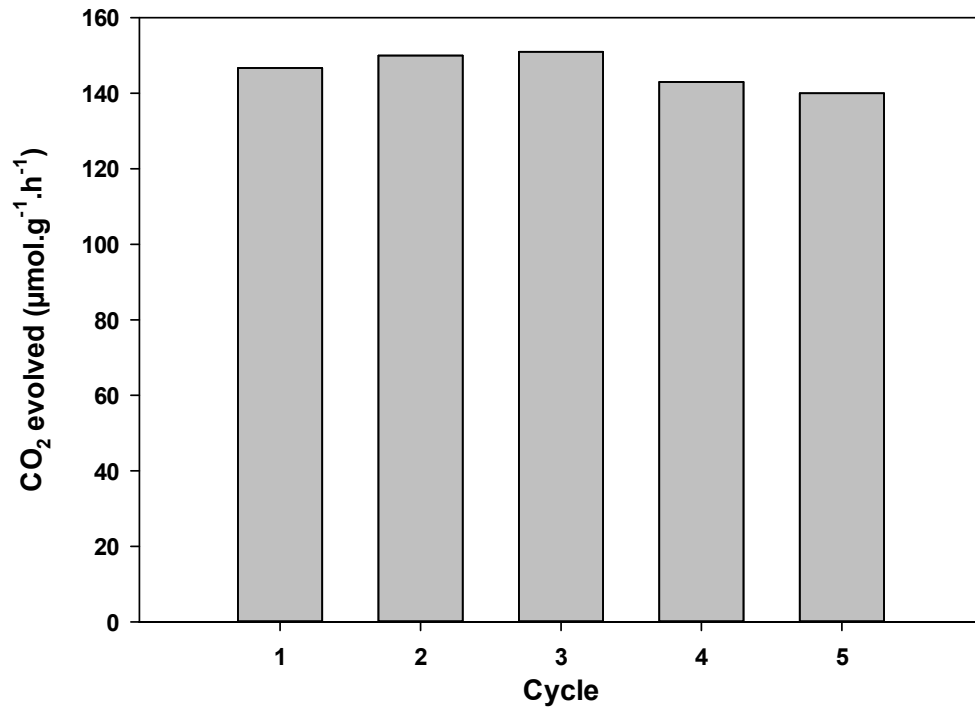

**Figure SI 12.** The stability of the hollow Sr/Rh-TiO<sub>2</sub>-900 over 5 cycles

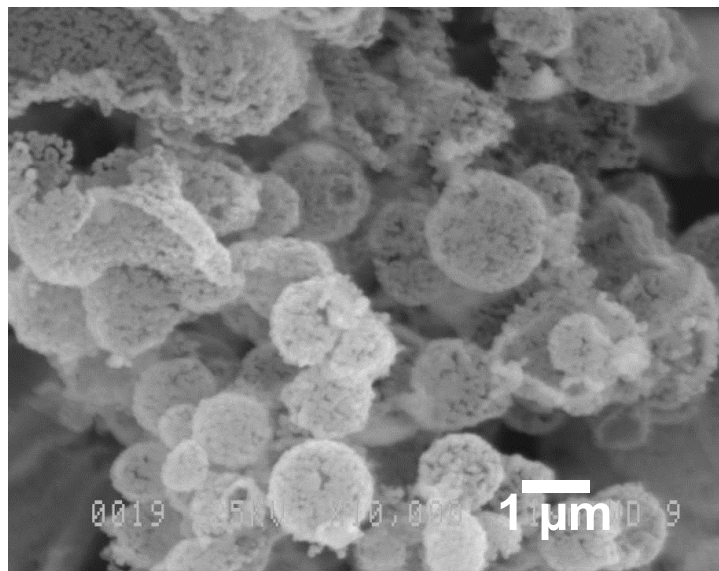

**Figure SI 13.** SEM image (A) and XRD pattern (B) of the hollow Sr/Rh-TiO<sub>2</sub>-900 after five cycles of reaction

1. Q. Sun and Y. Xu, *The Journal of Physical Chemistry C*, 2010, **114**, 18911-18918.
2. E. Glover, S. Ellington, G. Sankar and R. Palgrave, *Journal of Materials Chemistry A*, 2016,**4**, 6946-6954 .
